# Supplementary material
Source: PubMed Central journal article supplement (PMC6091890)

Dahl salt-sensitive rats

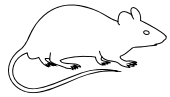

Normal-salt diet

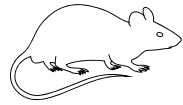

Control

Telemetry

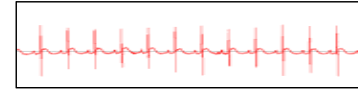

Normal Sinus Rhythm

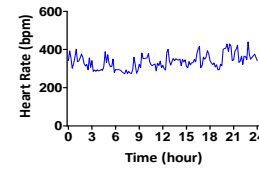

Heart Rate Variability

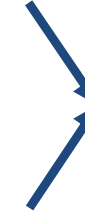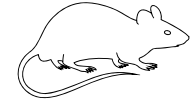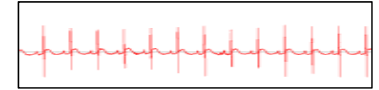

High-salt diet

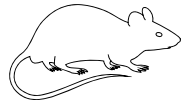

HFpEF

Hypertrophy  
Diastolic Dysfunction

Telemetry

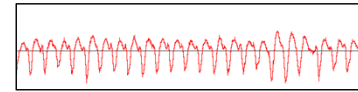

Ventricular Arrhythmias

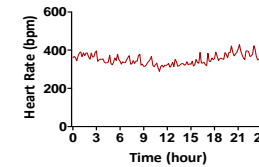

Reduced Heart Rate Variability

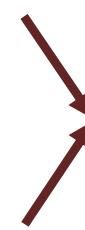

Sudden Death

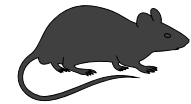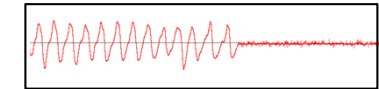

Supplement: NIHMS977469-supplement-006452_graphic_abstract.pdf [file NIHMS977469-supplement-006452_graphic_abstract.pdf]
